# Supplementary material
Source: publisher figshare collection journal article supplement (https://tandf.figshare.com/ndownloader/files/10761154)

---

# Supporting Information

## New lignan from the rattan stems of *Schisandra chinensis*

Bing-You Yang<sup>a</sup>, Zhang-Lin Chen<sup>a</sup>, Yan Liu<sup>a</sup>, Jiang-Tao Guo<sup>b</sup>, Hai-Xue Kuang<sup>a</sup>

<sup>a</sup>Key Laboratory of Chinese Materia Medica, Heilongjiang University of Chinese Medicine, Ministry of Education, Harbin 150040, People's Republic of China; <sup>b</sup>Gui Yang College of Traditional Chinese Medicine, Guiyang 550002, People's Republic of China

Corresponding Author

\*Tel: +86 0451-87267188; E-mail: [hxkuang@yahoo.com](mailto:hxkuang@yahoo.com)

### ABSTRACT:

A new lignan named schilignan F (**1**), together with twelve known ones (**2-13**), were isolated from the rattan stems of *Schisandra chinensis*. Their chemical structures were elucidated by spectroscopic methods including one and two-dimensional NMR spectra referring to the literatures, as well as high-resolution mass spectrometric analysis. All compounds were evaluated for their cytotoxicities against human Hela cancer cell lines *in vitro*. The results showed that compounds **2**, **6** and **8** exhibited weak cytotoxic activity with IC<sub>50</sub> values of 30.6, 86.3 and 41.0 μM, and cisplatin showed cytotoxic activity with IC<sub>50</sub> value of 27.3 μM.

**Keywords:** *Magnoliaceae*, Lignan, *Schisandra chinensis*, Natural products, Cytotoxicity

**Table S1** <sup>13</sup>C-NMR Data of **2-13** (100 MHz in <sup>13</sup>C NMR, CD<sub>3</sub>OD)

| NO.              | 2     | 3     | 4     | 5     | 6     | 7     | 8     | 9     | 10    | 11    | 12    | 13    |
|------------------|-------|-------|-------|-------|-------|-------|-------|-------|-------|-------|-------|-------|
| 1                | 139.1 | 138.4 | 138.8 | 133.2 | 134.7 | 128.5 | 129.1 | 133.7 | 138.8 | 146.3 | 146.4 | 130.6 |
| 2                | 111.3 | 111.3 | 111.2 | 109.3 | 110.8 | 114.0 | 112.7 | 111.6 | 112.7 | 150.8 | 150.8 | 111.9 |
| 3                | 152.1 | 150.9 | 152.1 | 147.6 | 149.0 | 148.4 | 149.1 | 148.8 | 148.9 | 118.4 | 118.3 | 153.4 |
| 4                | 146.4 | 147.6 | 146.6 | 146.0 | 147.4 | 147.5 | 147.5 | 147.6 | 145.6 | 136.5 | 136.5 | 149.1 |
| 5                | 119.1 | 118.0 | 119.6 | 114.6 | 116.1 | 115.2 | 116.0 | 115.8 | 116.1 | 122.2 | 122.1 | 115.8 |
| 6                | 119.6 | 119.4 | 119.1 | 118.3 | 119.8 | 122.4 | 121.6 | 120.7 | 121.5 | 114.1 | 114.2 | 124.7 |
| 7                | 88.3  | 88.5  | 88.6  | 87.8  | 89.2  | 90.0  | 89.3  | 74.1  | 67.3  | 40.8  | 40.8  | 199.7 |
| 8                | 55.9  | 55.6  | 55.7  | 51.5  | 52.9  | 99.2  | 92.8  | 87.7  | 37.3  | 139.0 | 139.0 | 41.7  |
| 9                | 65.2  | 65.1  | 62.2  | 70.9  | 72.3  | 73.1  | 76.1  | 61.8  | 9.9   | 115.9 | 115.9 | 58.9  |
| 1'               | 136.9 | 137.1 | 137.1 | 135.6 | 137.0 | 133.1 | 133.6 | 138.2 | 138.0 | 103.1 | 103.0 |       |
| 2'               | 117.1 | 114.2 | 114.1 | 112.6 | 114.2 | 110.6 | 111.3 | 114.1 | 112.7 | 74.9  | 75.0  |       |
| 3'               | 141.9 | 145.3 | 145.2 | 143.8 | 145.2 | 149.3 | 148.7 | 151.6 | 148.8 | 78.0  | 78.2  |       |
| 4'               | 146.5 | 147.5 | 147.5 | 146.0 | 147.5 | 147.3 | 147.4 | 147.2 | 145.5 | 71.6  | 71.4  |       |
| 5'               | 129.5 | 129.6 | 129.1 | 128.3 | 129.7 | 116.3 | 115.6 | 119.6 | 116.1 | 77.8  | 77.9  |       |
| 6'               | 116.7 | 118.0 | 117.9 | 116.8 | 118.2 | 119.9 | 120.5 | 122.1 | 121.6 | 68.7  | 62.5  |       |
| 7'               | 32.7  | 32.9  | 32.9  | 31.5  | 32.9  | 86.8  | 87.8  | 32.7  | 57.3  |       |       |       |
| 8'               | 35.9  | 35.8  | 35.8  | 34.4  | 35.8  | 60.3  | 62.4  | 32.7  | 36.9  |       |       |       |
| 9'               | 62.3  | 62.3  | 65.1  | 60.8  | 62.2  | 72.2  | 72.0  | 69.9  | 12.2  |       |       |       |
| OCH <sub>3</sub> | 56.5  | 56.8  | 56.4  | 55.0  | 56.8  | 56.5  | 56.4  | 56.3  | 56.4  | 56.7  | 56.7  | 56.4  |
| OCH <sub>3</sub> |       | 56.8  | 56.7  | 56.3  | 56.5  | 56.6  | 56.4  | 56.5  | 56.4  |       |       |       |
| 1''              | 101.3 | 102.8 | 101.4 | 102.8 | 104.3 | 100.1 |       | 104.5 |       | 111.0 |       |       |
| 2''              | 72.1  | 74.9  | 72.2  | 73.7  | 75.2  | 74.8  |       | 75.2  |       | 77.0  |       |       |
| 3''              | 72.2  | 78.2  | 72.1  | 76.8  | 78.2  | 78.3  |       | 77.9  |       | 80.5  |       |       |
| 4''              | 73.9  | 71.4  | 73.9  | 70.2  | 71.7  | 71.1  |       | 71.7  |       | 75.0  |       |       |
| 5''              | 70.8  | 77.8  | 70.8  | 76.6  | 78.1  | 78.0  |       | 78.1  |       | 65.6  |       |       |
| 6''              | 17.9  | 62.5  | 18.0  | 61.3  | 62.8  | 62.4  |       | 62.8  |       |       |       |       |

**Table S2** Cytotoxic activities of compounds (**1-13**) from the rattan stems of *S. chinensis*.

| Growth Inhibition Constant (IC <sub>50</sub> in $\mu\text{M}$ ) <sup>a</sup> |                                    |                    |                                    |
|------------------------------------------------------------------------------|------------------------------------|--------------------|------------------------------------|
| Drugs                                                                        | IC <sub>50</sub> ( $\mu\text{M}$ ) | Drugs              | IC <sub>50</sub> ( $\mu\text{M}$ ) |
| cisplatin <sup>b</sup>                                                       | 27.3 $\pm$ 1.9                     | Compound <b>7</b>  | >100                               |
| Compound <b>1</b>                                                            | >100                               | Compound <b>8</b>  | >100                               |
| Compound <b>2</b>                                                            | 30.6 $\pm$ 1.7                     | Compound <b>9</b>  | 41.0 $\pm$ 3.5                     |
| Compound <b>3</b>                                                            | >100                               | Compound <b>10</b> | >100                               |
| Compound <b>4</b>                                                            | >100                               | Compound <b>11</b> | >100                               |
| Compound <b>5</b>                                                            | >100                               | Compound <b>12</b> | >100                               |
| Compound <b>6</b>                                                            | 86.3 $\pm$ 5.2                     | Compound <b>13</b> | >100                               |

<sup>a</sup>IC<sub>50</sub> was defined as the concentration that resulted in a 50% decrease in cell number

The IC<sub>50</sub> greater than 100  $\mu\text{M}$  was deemed inactive.

<sup>b</sup>Positive control.

**Fig.S1.**  $^1\text{H}$ -NMR (400 MHz) Spectrum of compound **1** in  $\text{CD}_3\text{OD}$

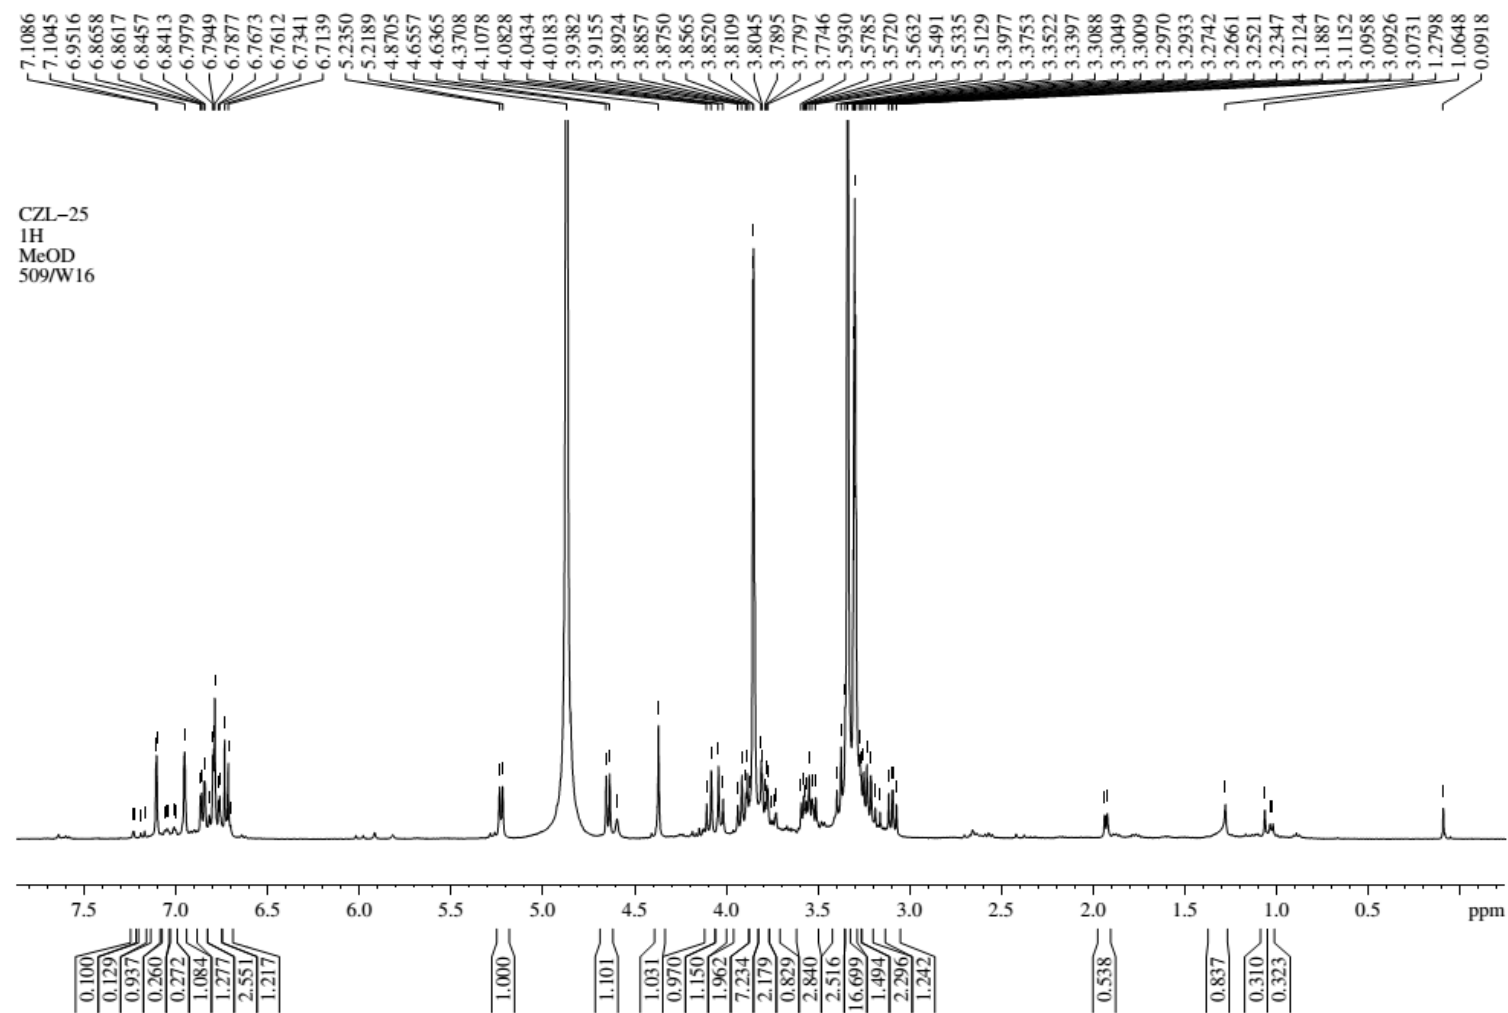

**Fig.S2.**  $^{13}\text{C}$ -NMR (100 MHz) Spectrum of compound **1** in  $\text{CD}_3\text{OD}$

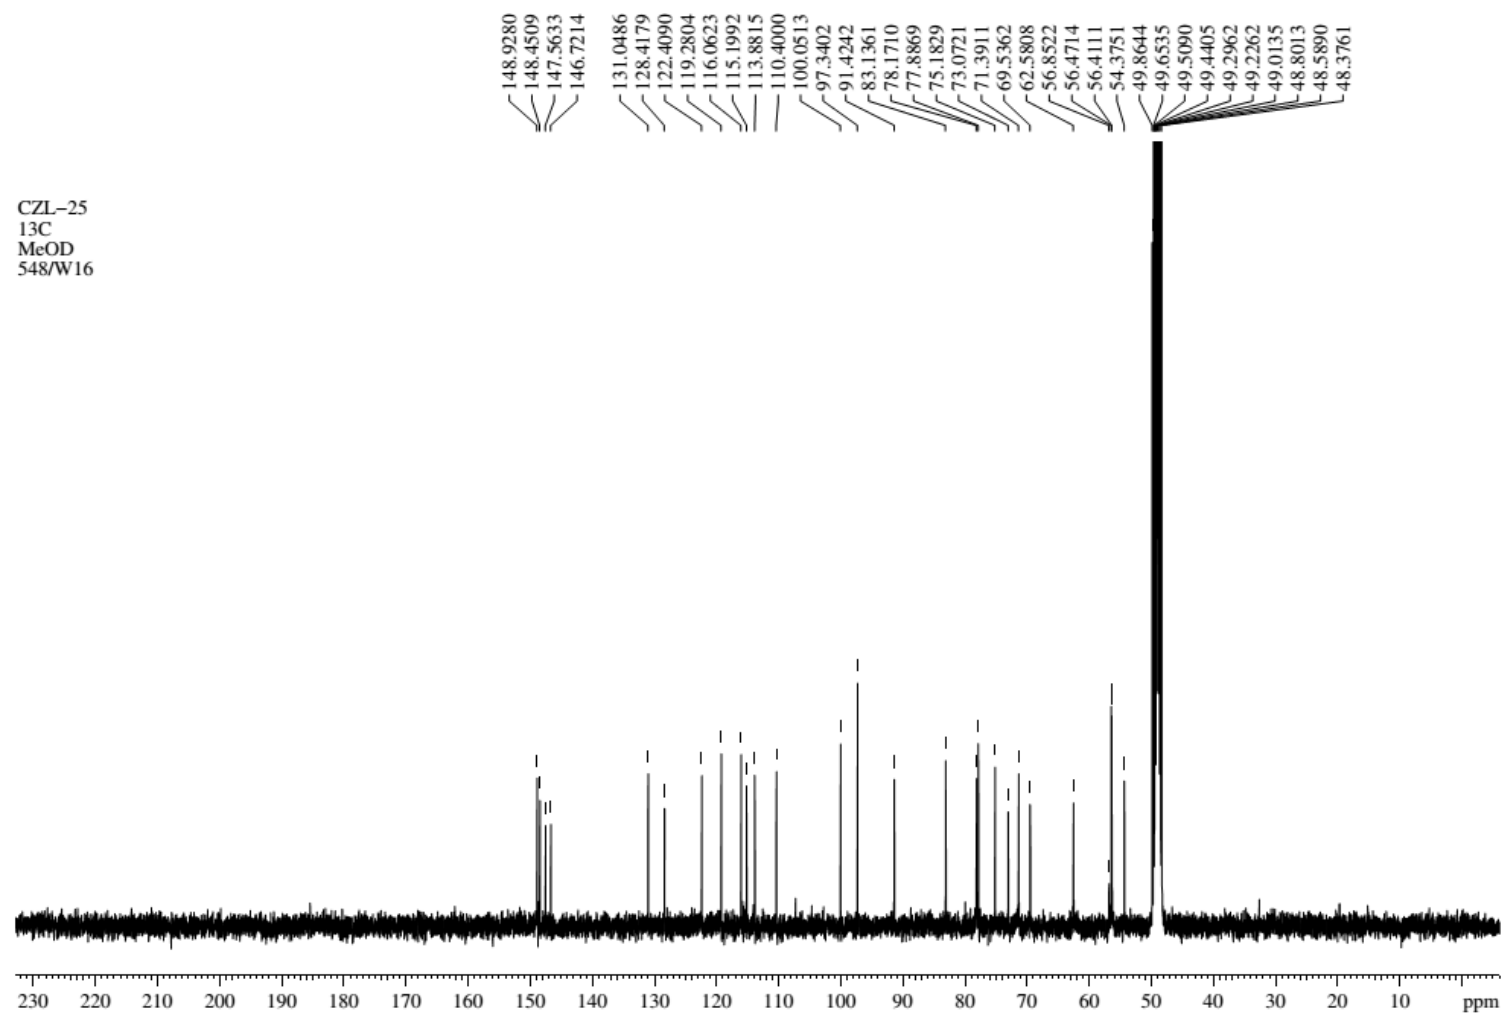

**Fig.S3.** DEPT Spectrum of compound **1** in CD<sub>3</sub>OD

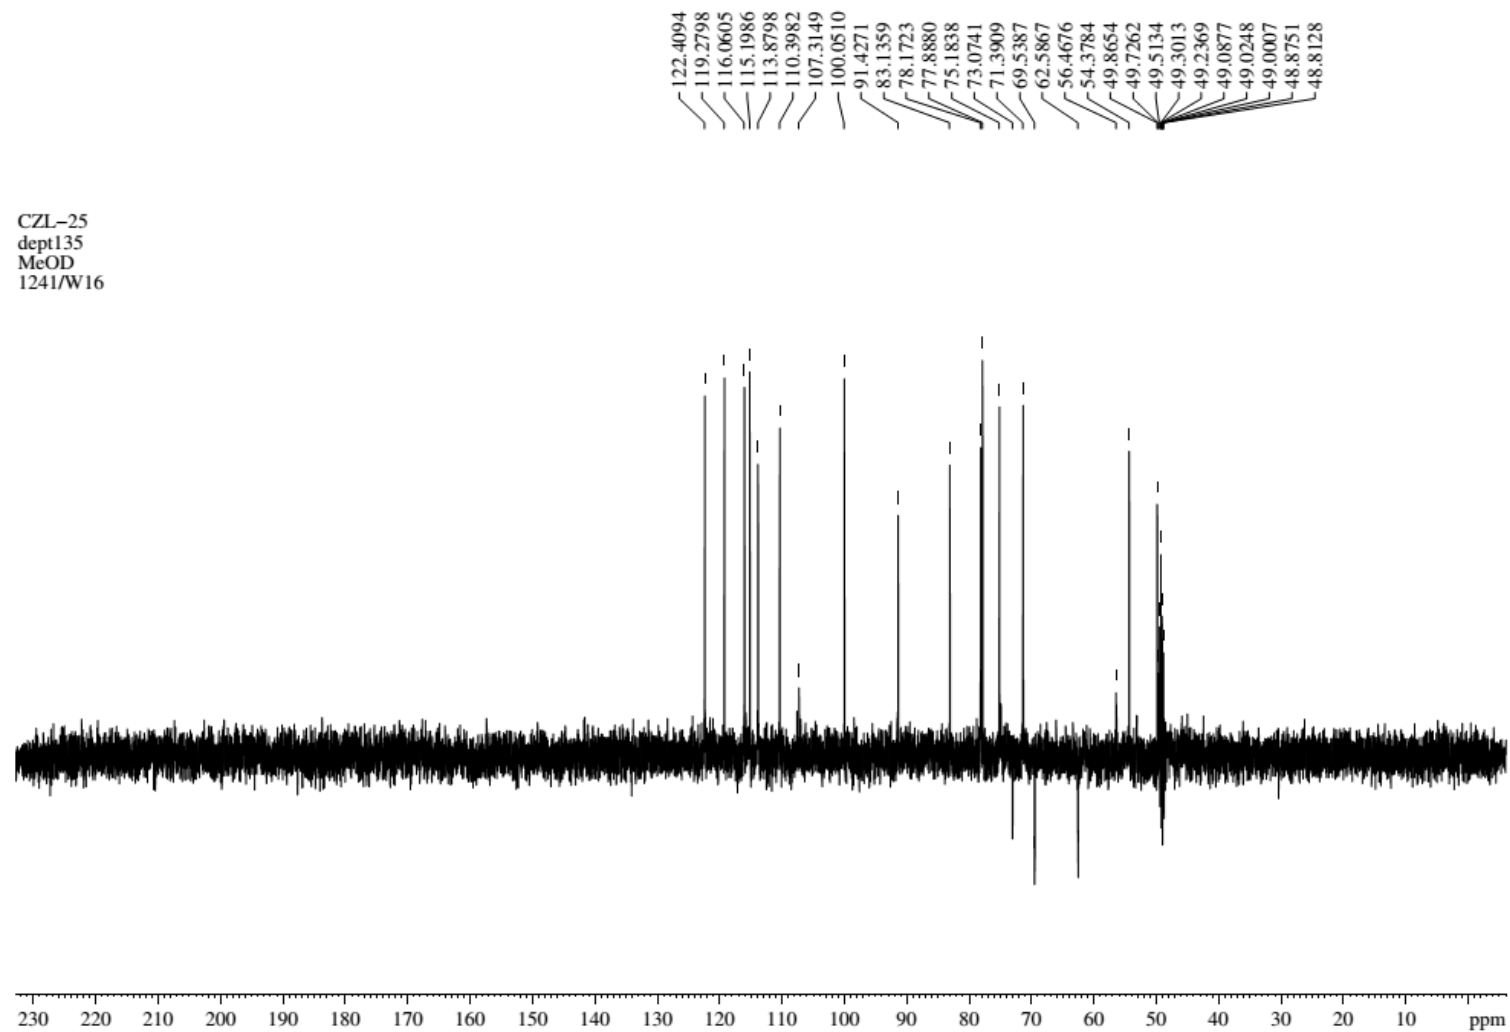

**Fig.S4.**  $^1\text{H}$ - $^1\text{H}$  COSY Spectrum of compound **1** in  $\text{CD}_3\text{OD}$

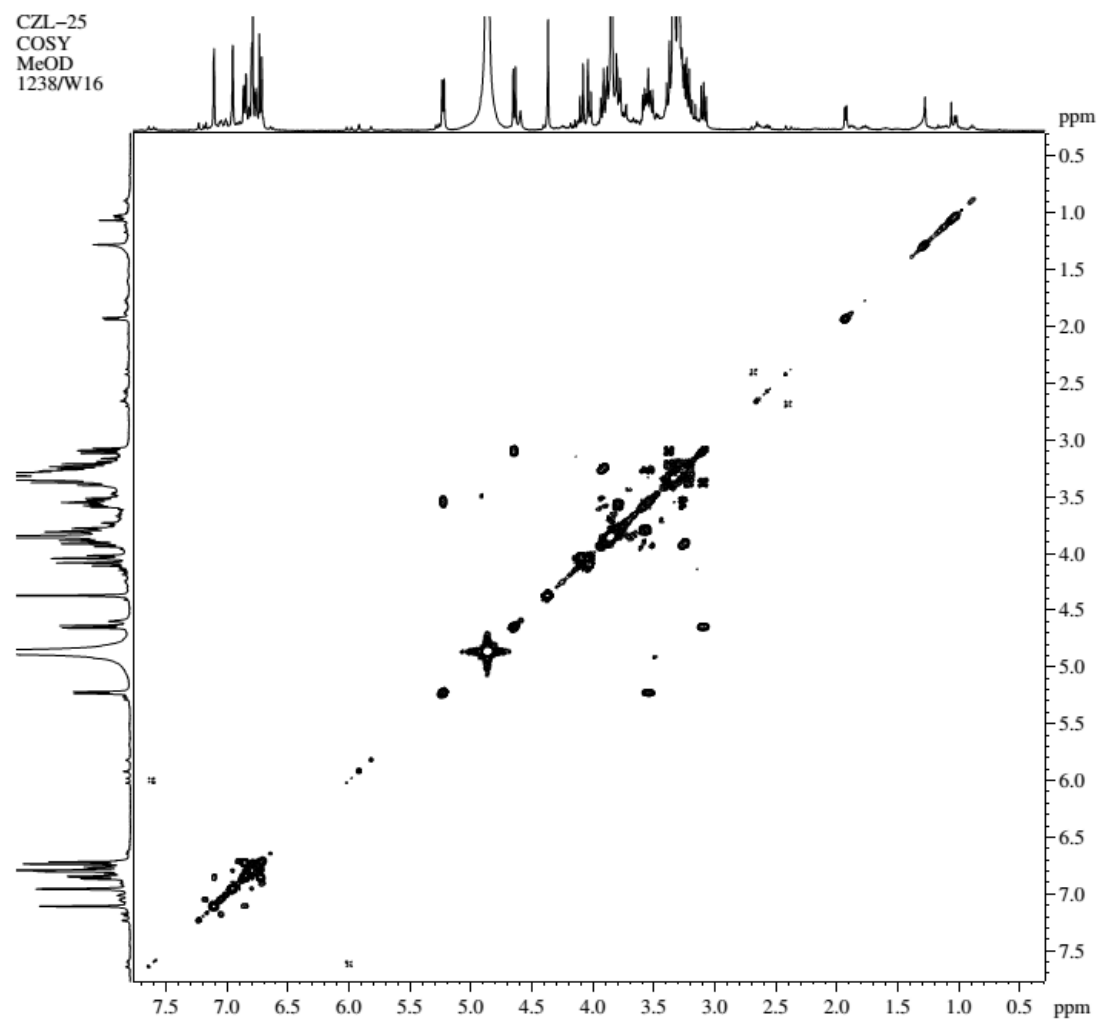

**Fig.S5.** HSQC Spectrum of compound **1** in CD<sub>3</sub>OD

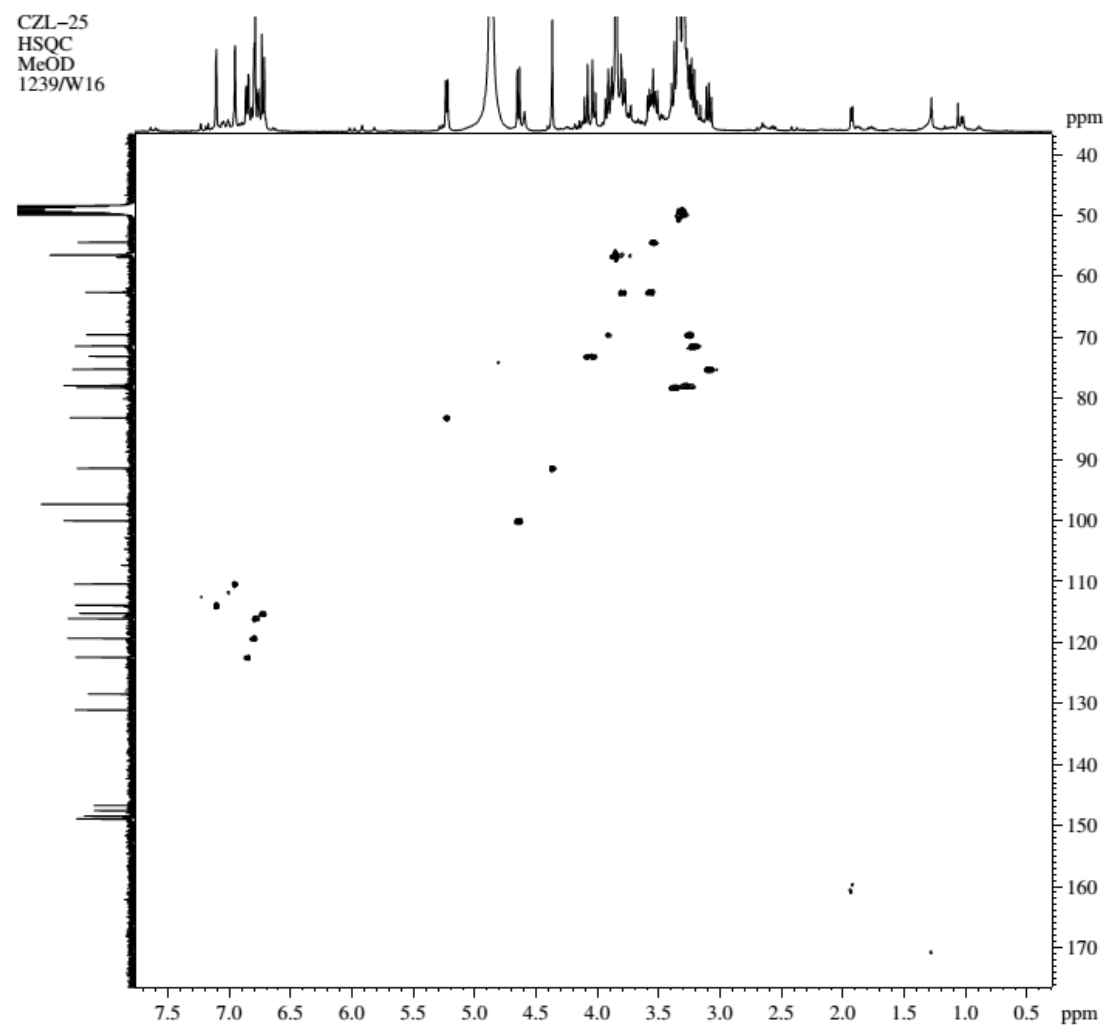



**Fig.S6.** HMBC Spectrum of compound **1** in CD<sub>3</sub>OD

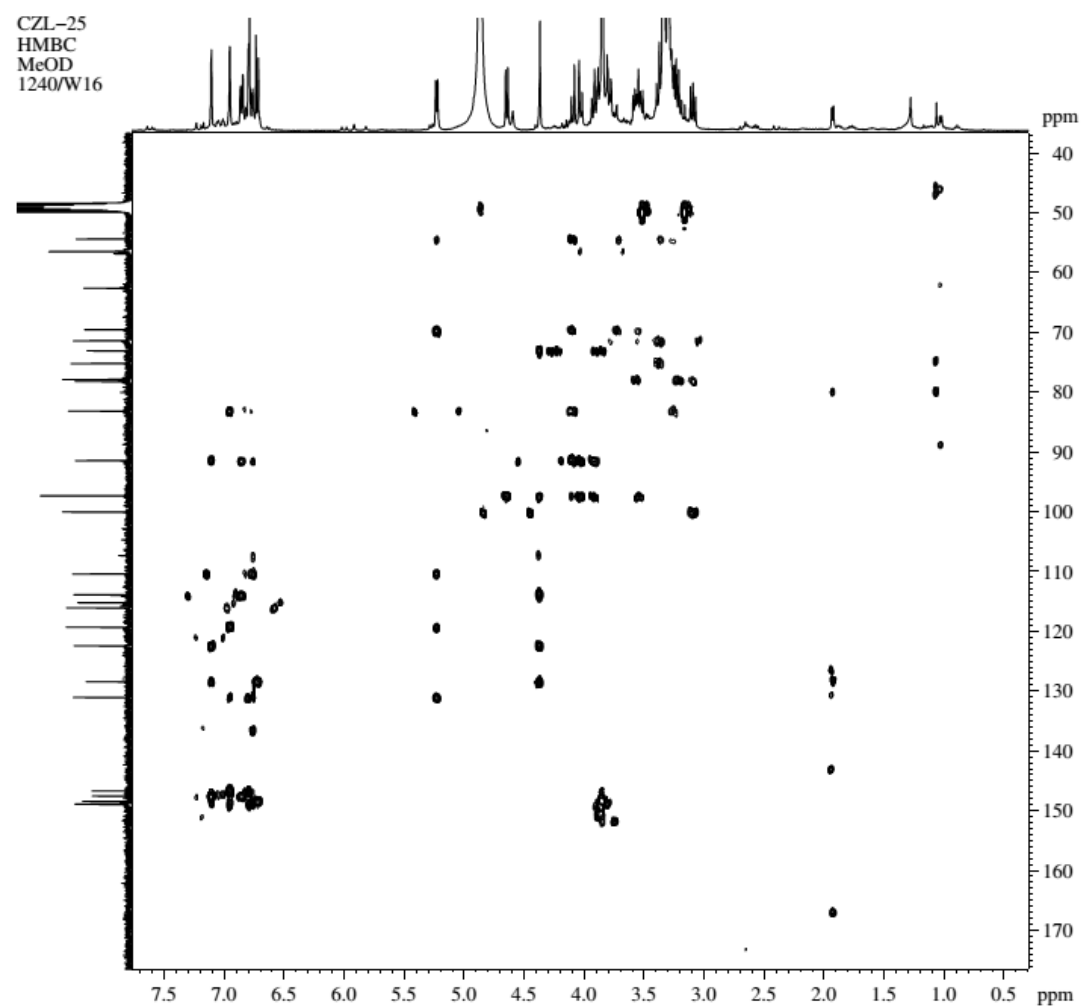

**Fig.S7.** MS Spectrum of compound **1**

CZL-70+95 1164 (18.040)

1: TOF MS ES+  
2.04e4

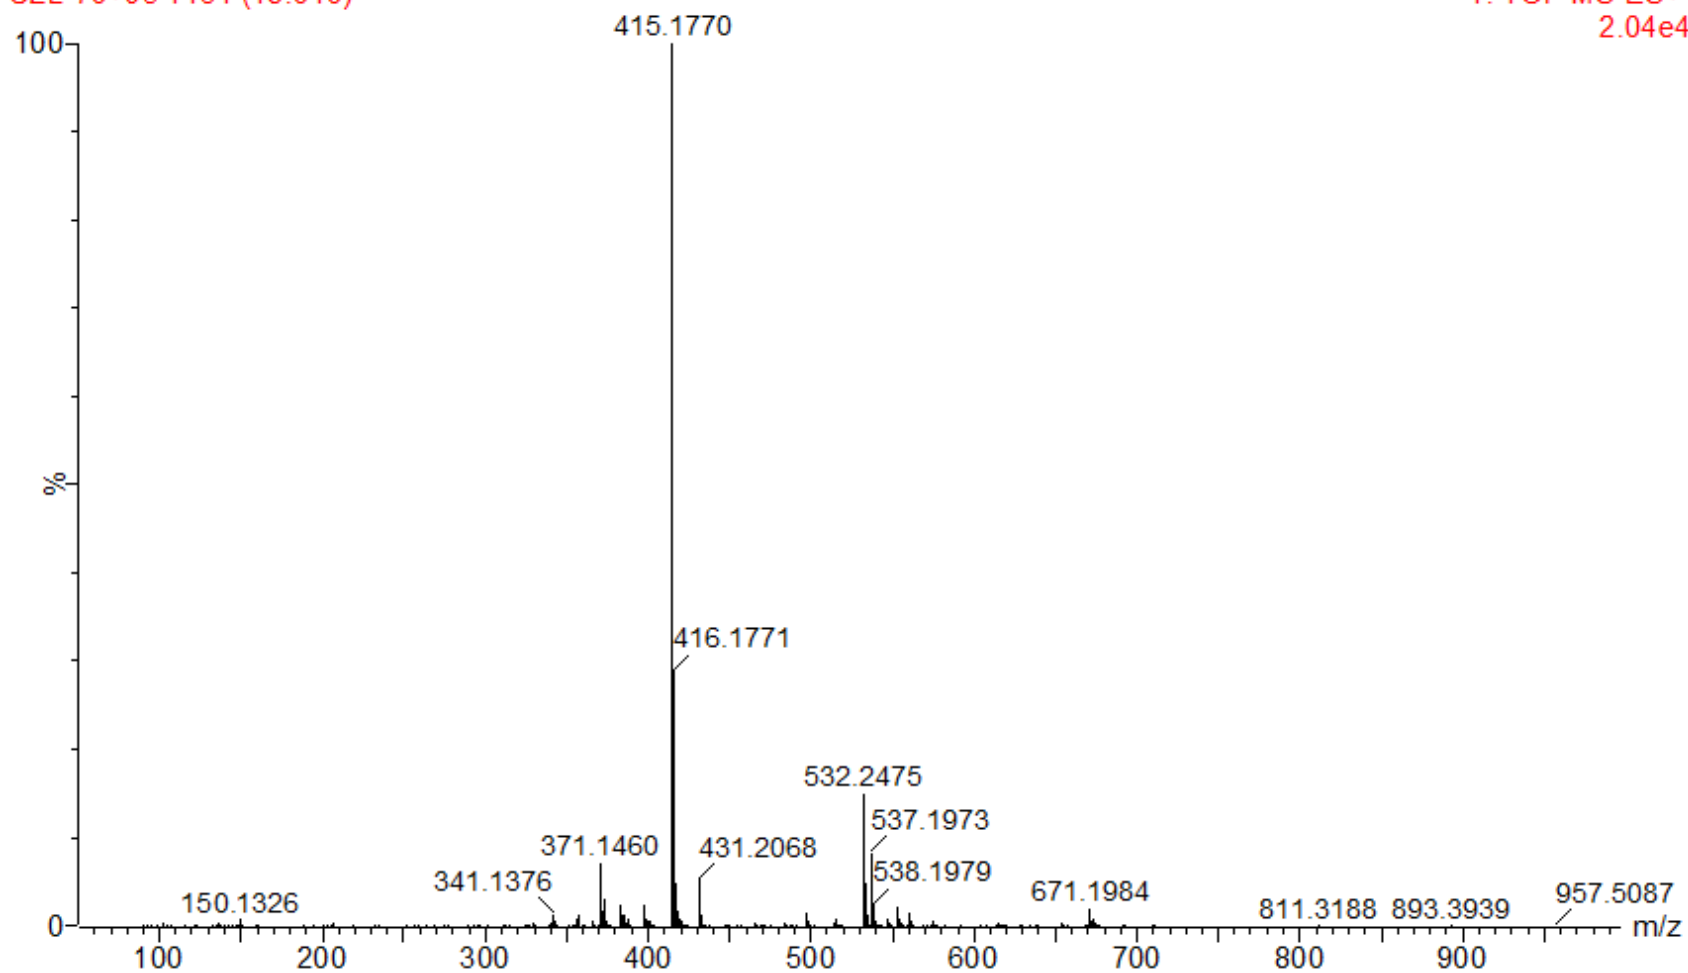

**Fig.S8.** Key HMBC and  $^1\text{H}$ - $^1\text{H}$  COSY correlations of compound **1**

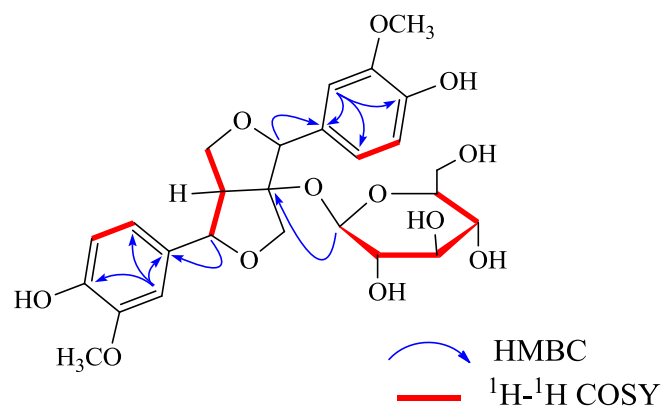

Fig.S9. MS Spectrum of compound 2

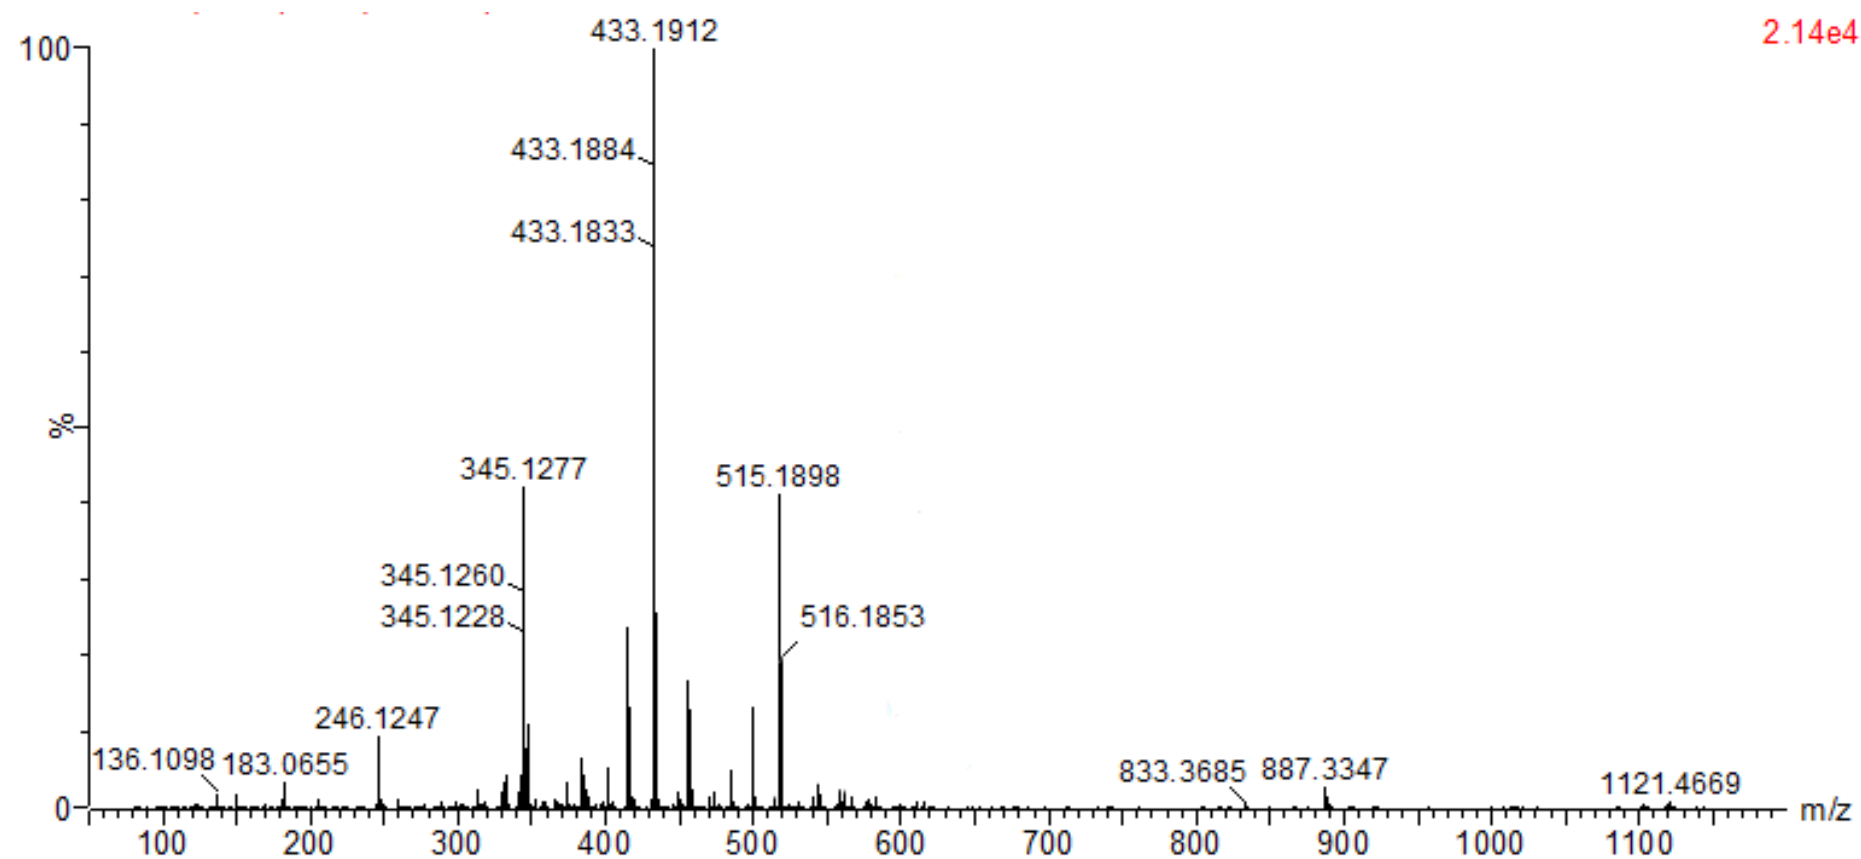

**Fig.S10.** MS Spectrum of compound **3**

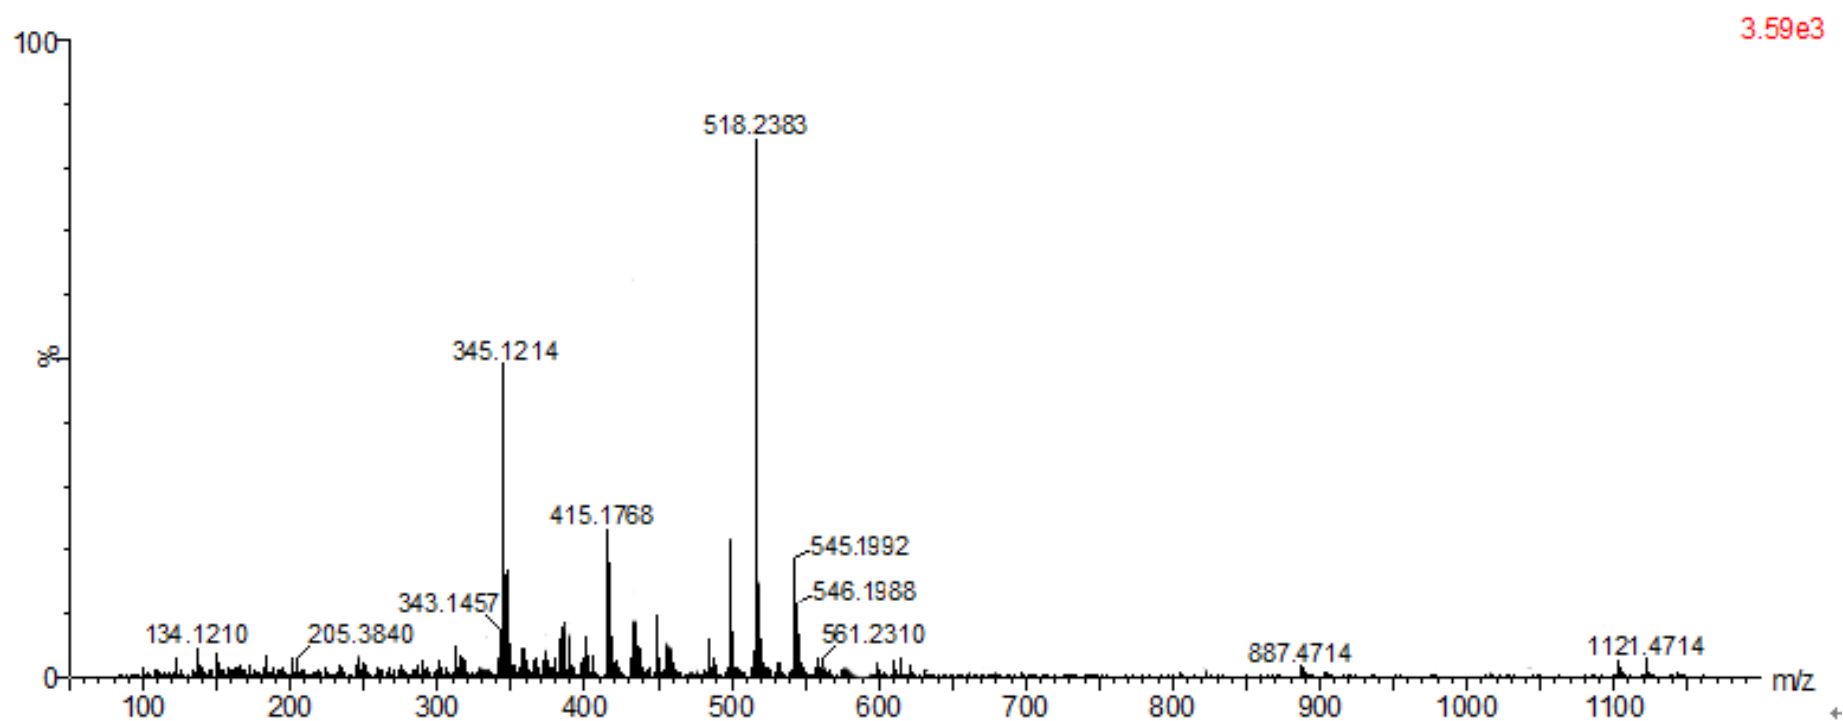

Fig.S11. MS Spectrum of compound 4

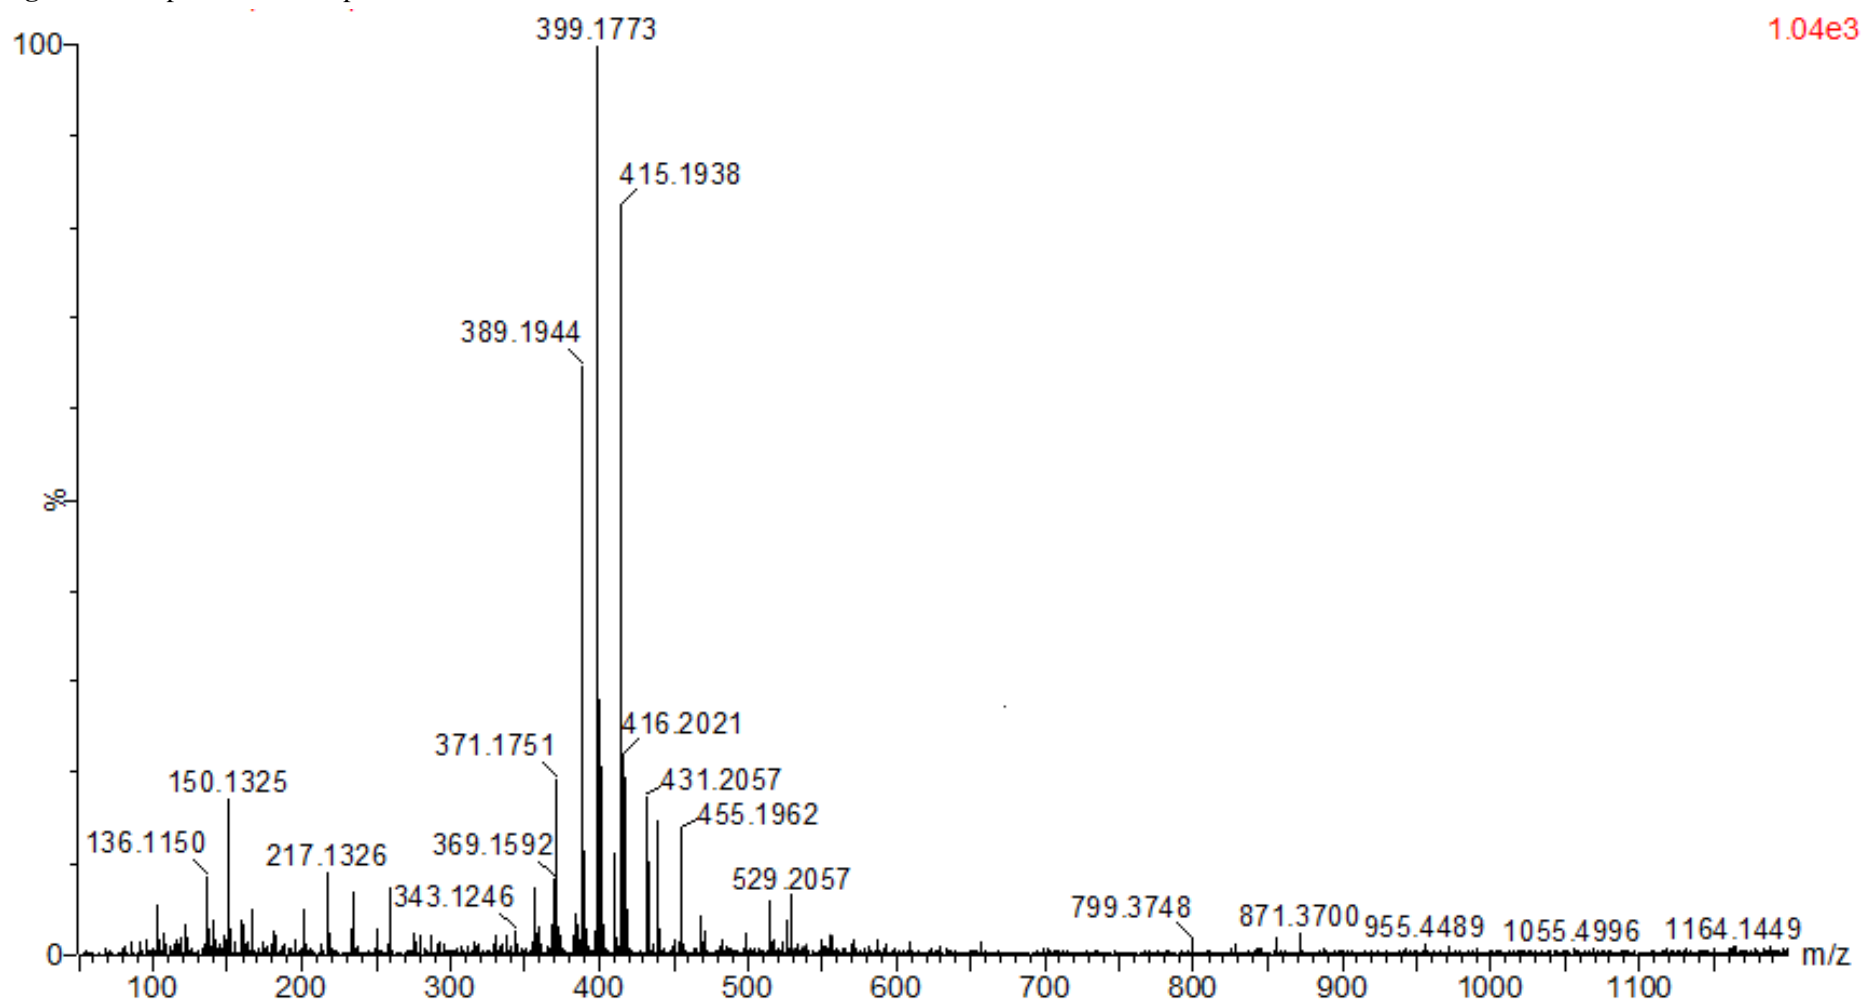

Fig.S12. MS Spectrum of compound 5

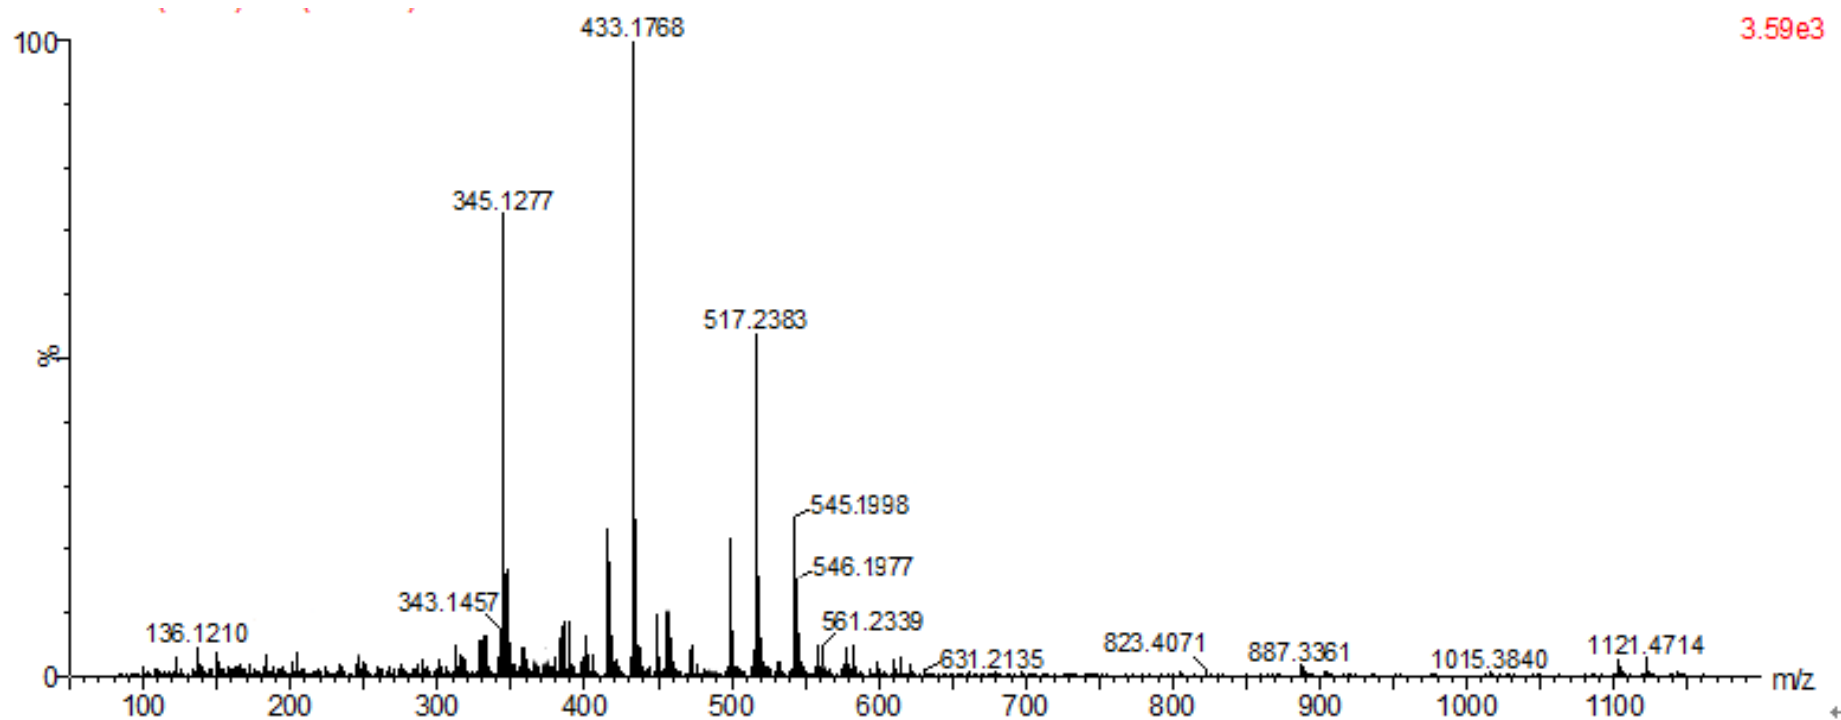

Fig.S13. MS Spectrum of compound 6

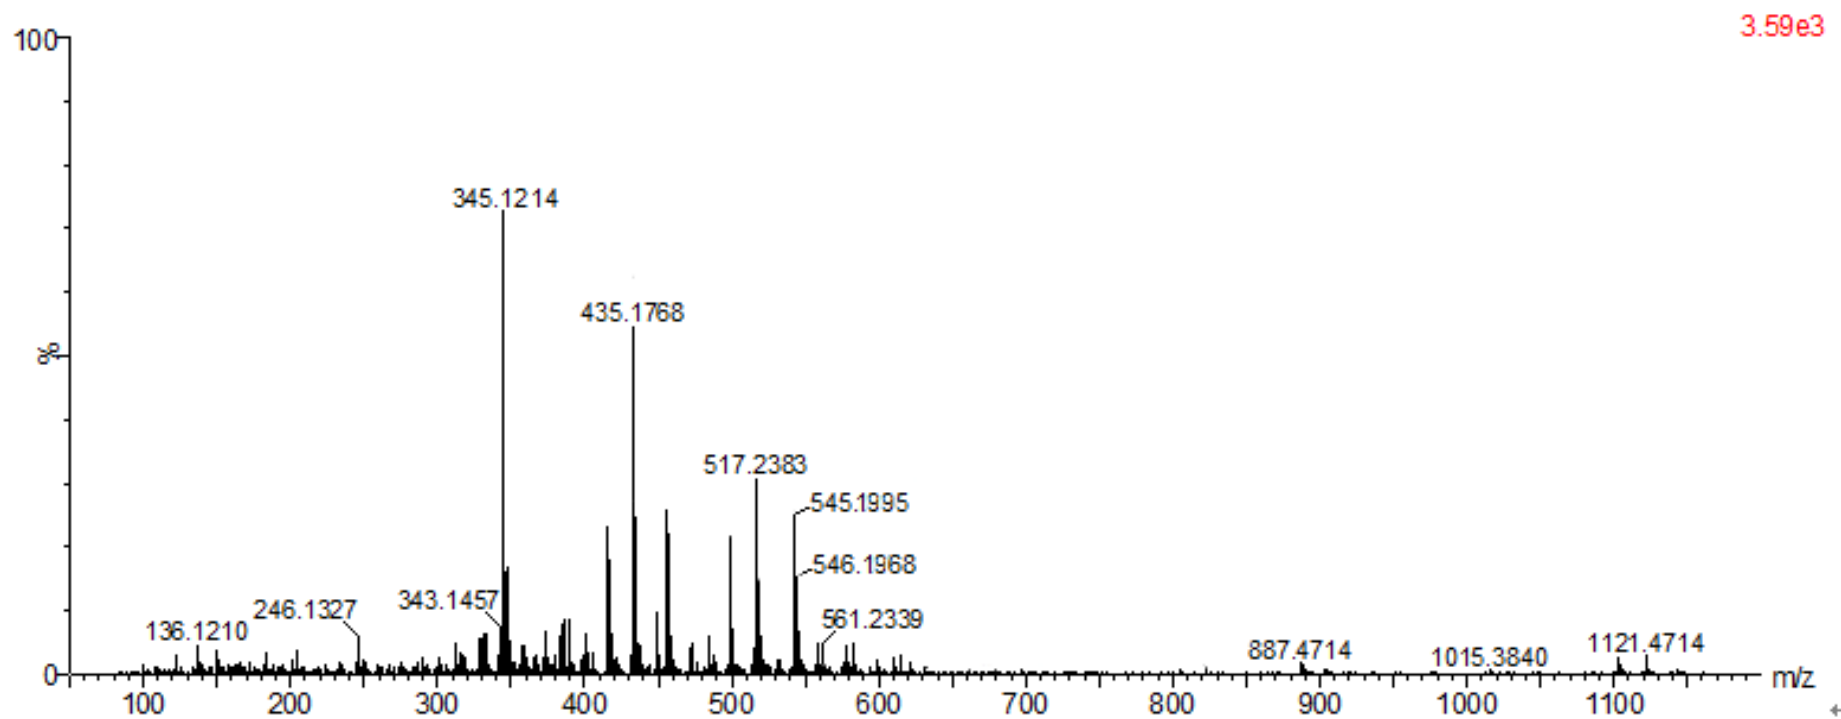



**Fig.S14.** MS Spectrum of compound **7**

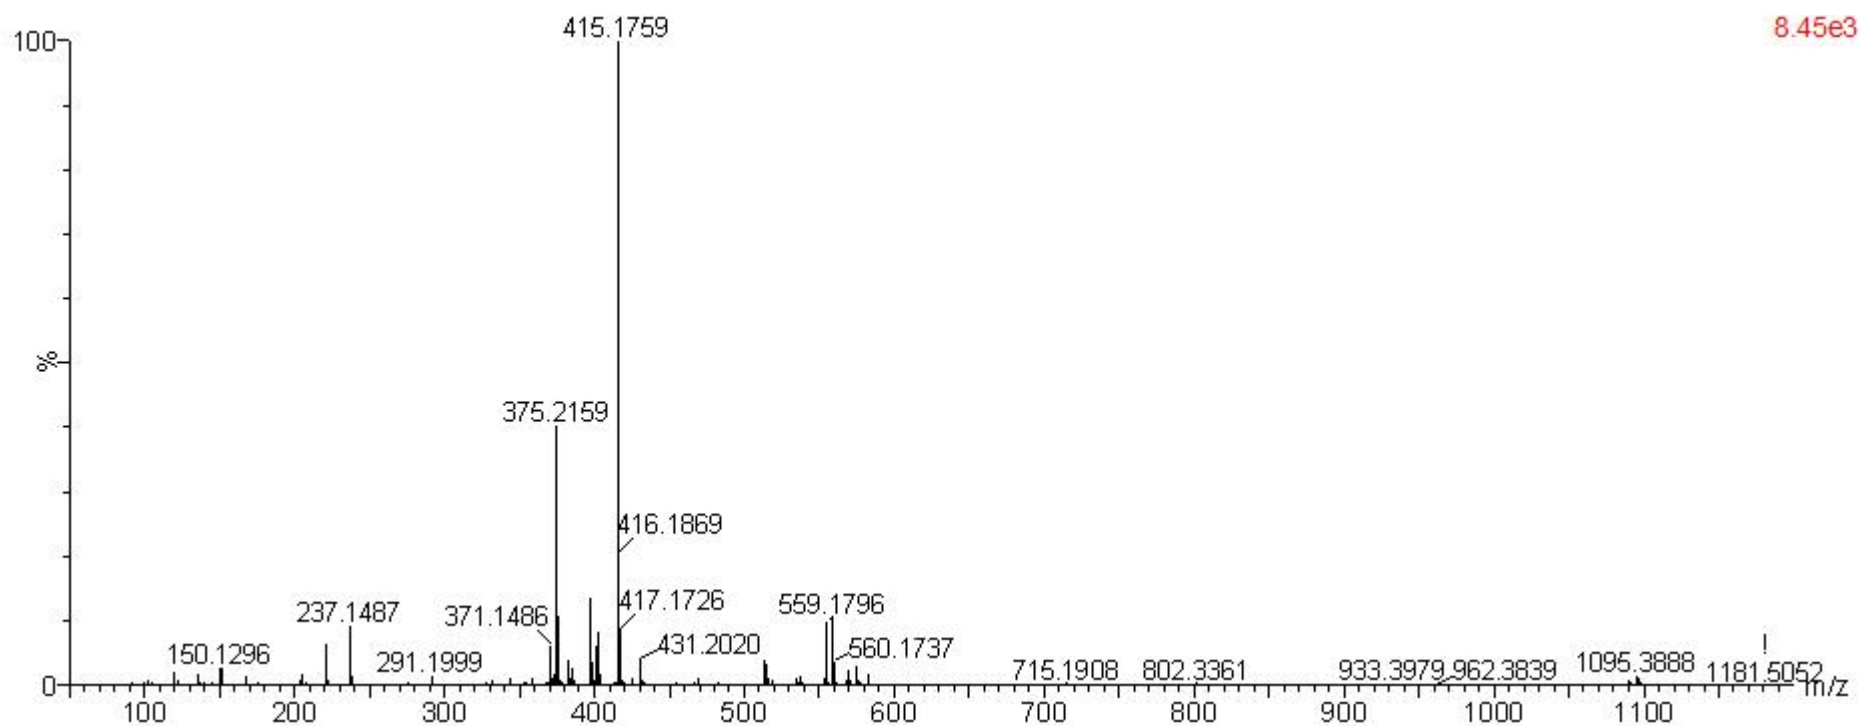

Fig.S15. MS Spectrum of compound 8

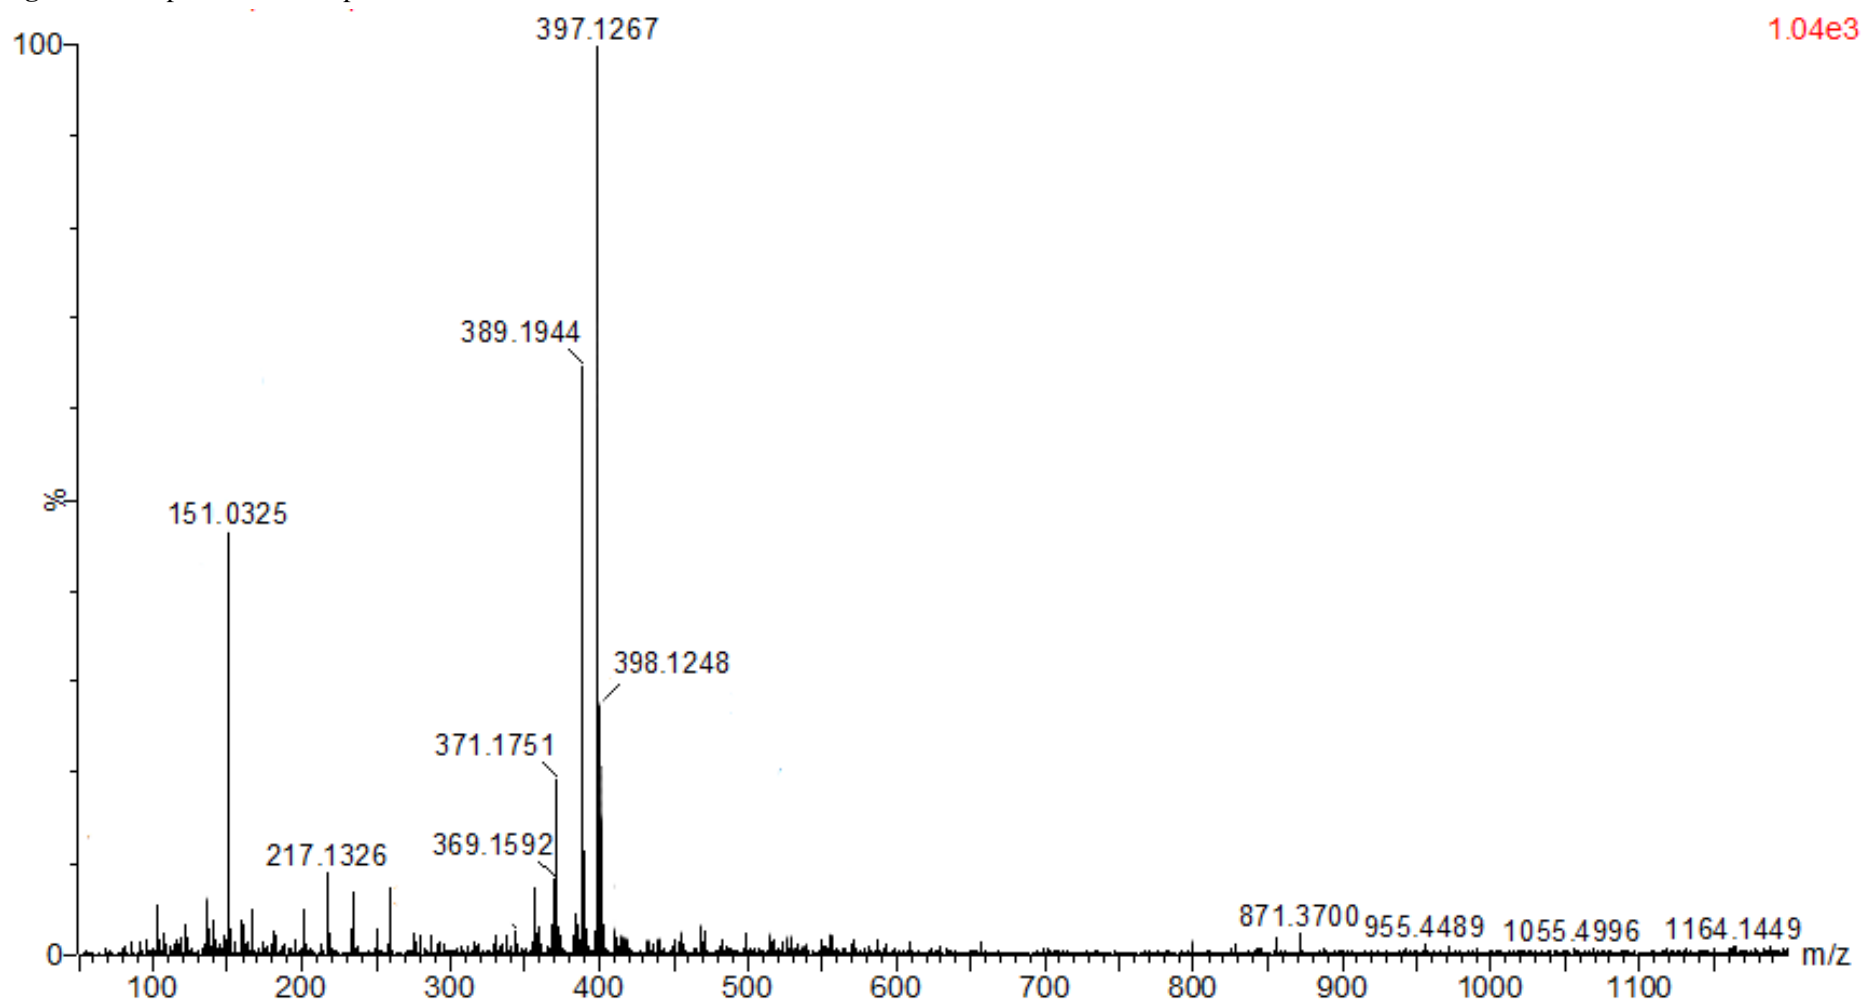

Fig.S16. MS Spectrum of compound 9

2.14e4

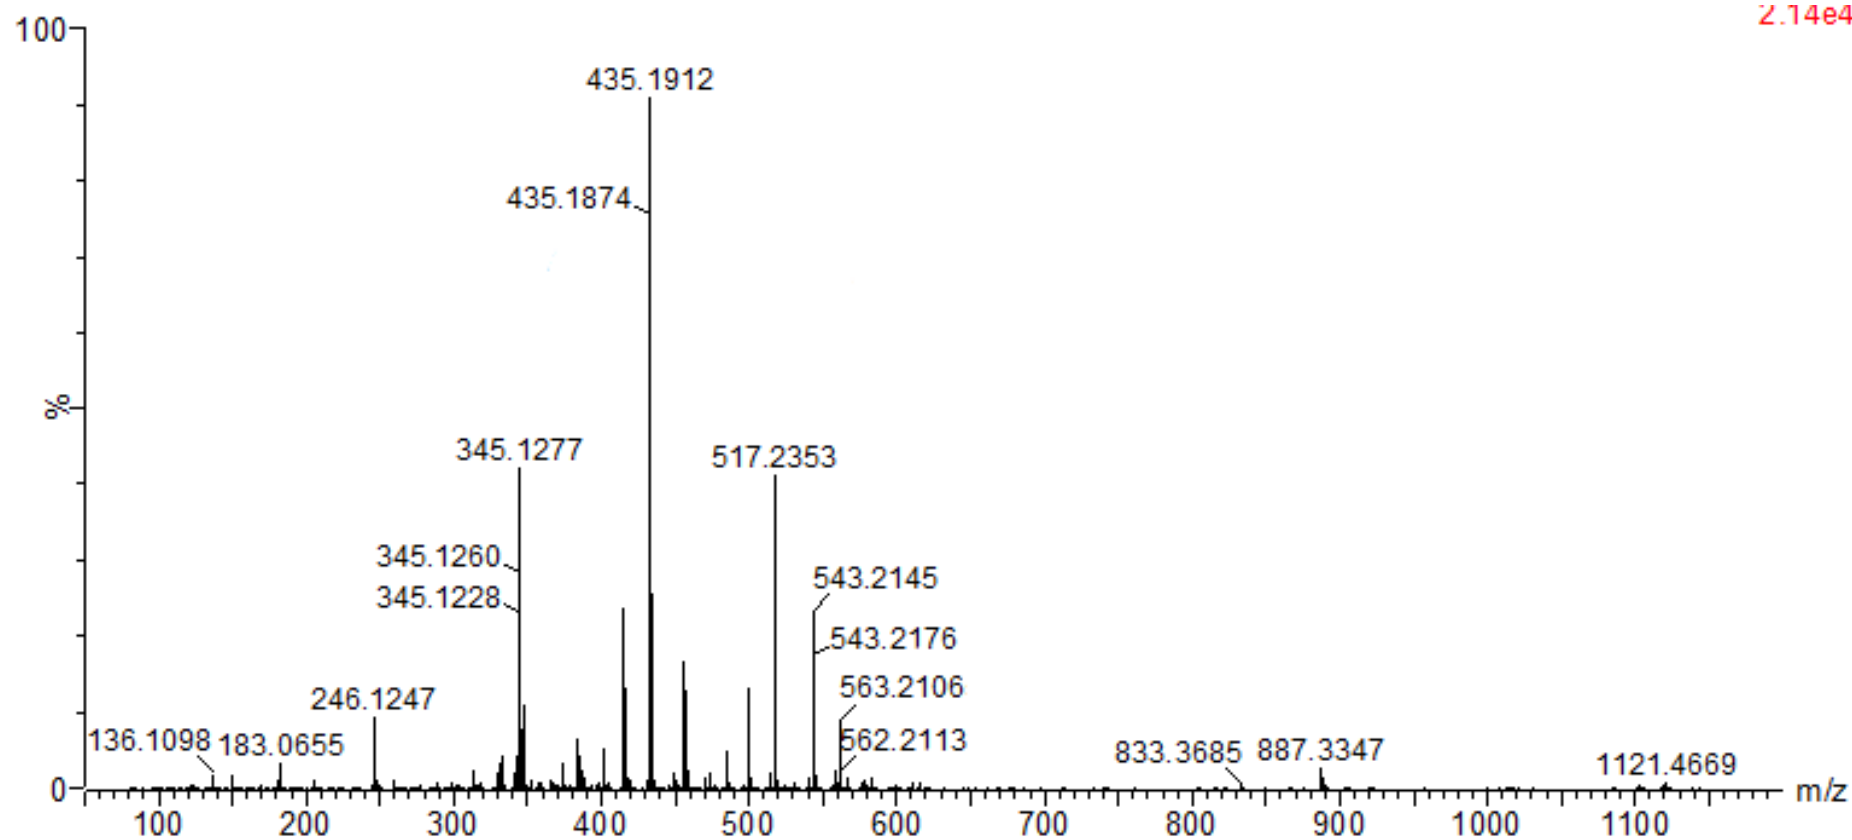

Fig.S17. MS Spectrum of compound 10

2.14e4

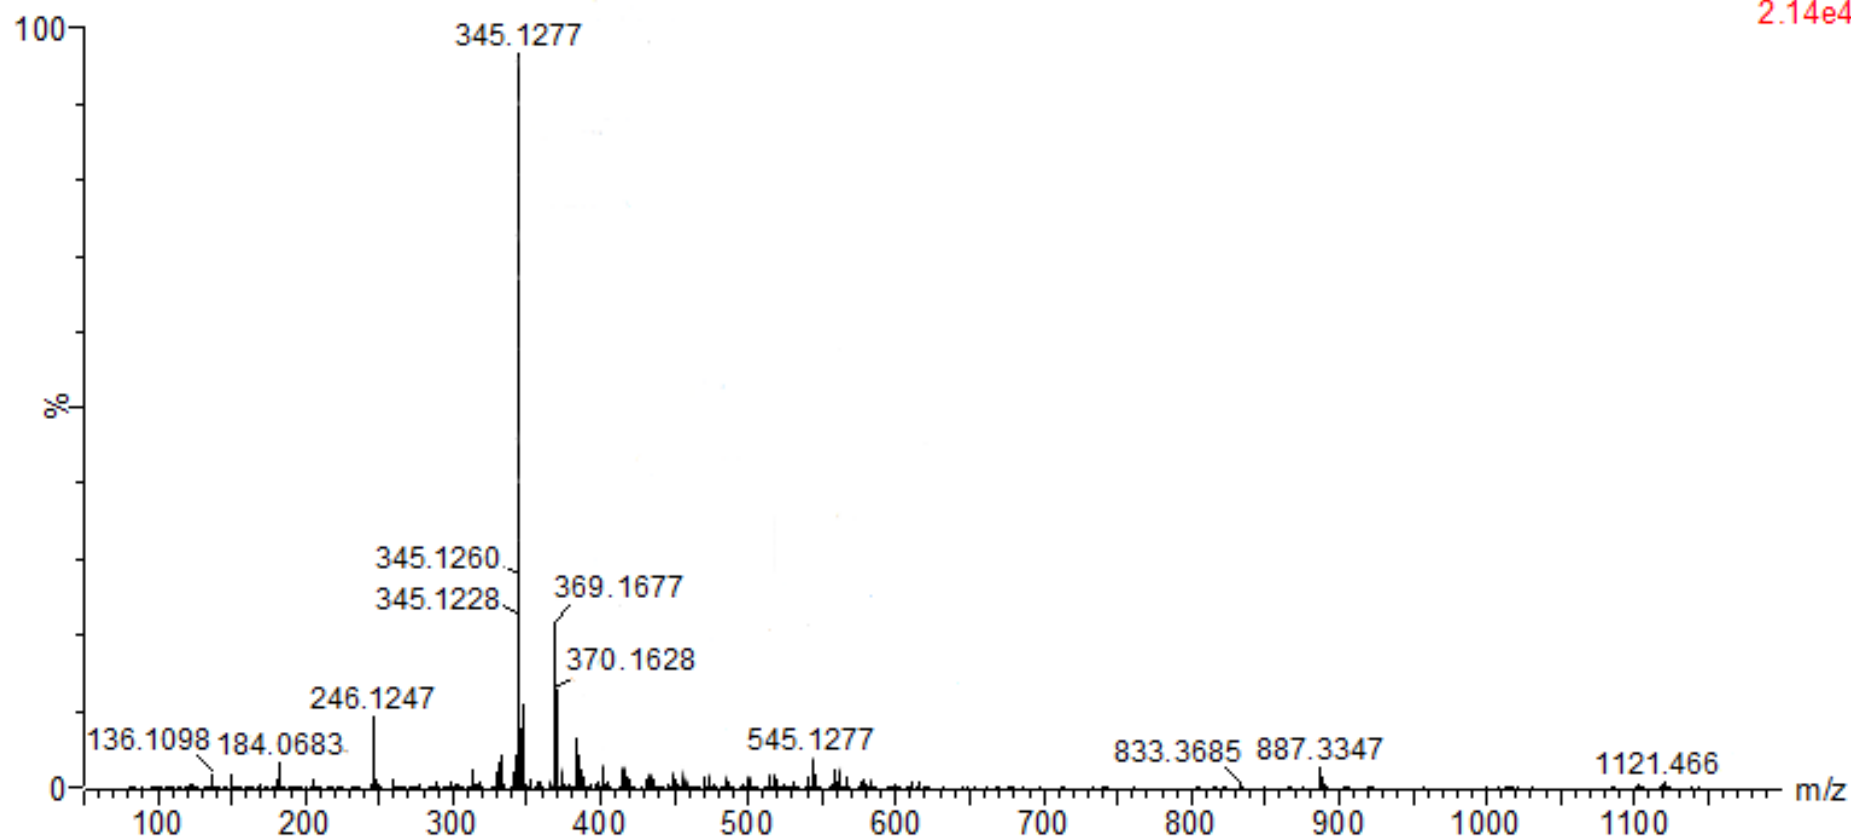

Fig.S18. MS Spectrum of compound 11

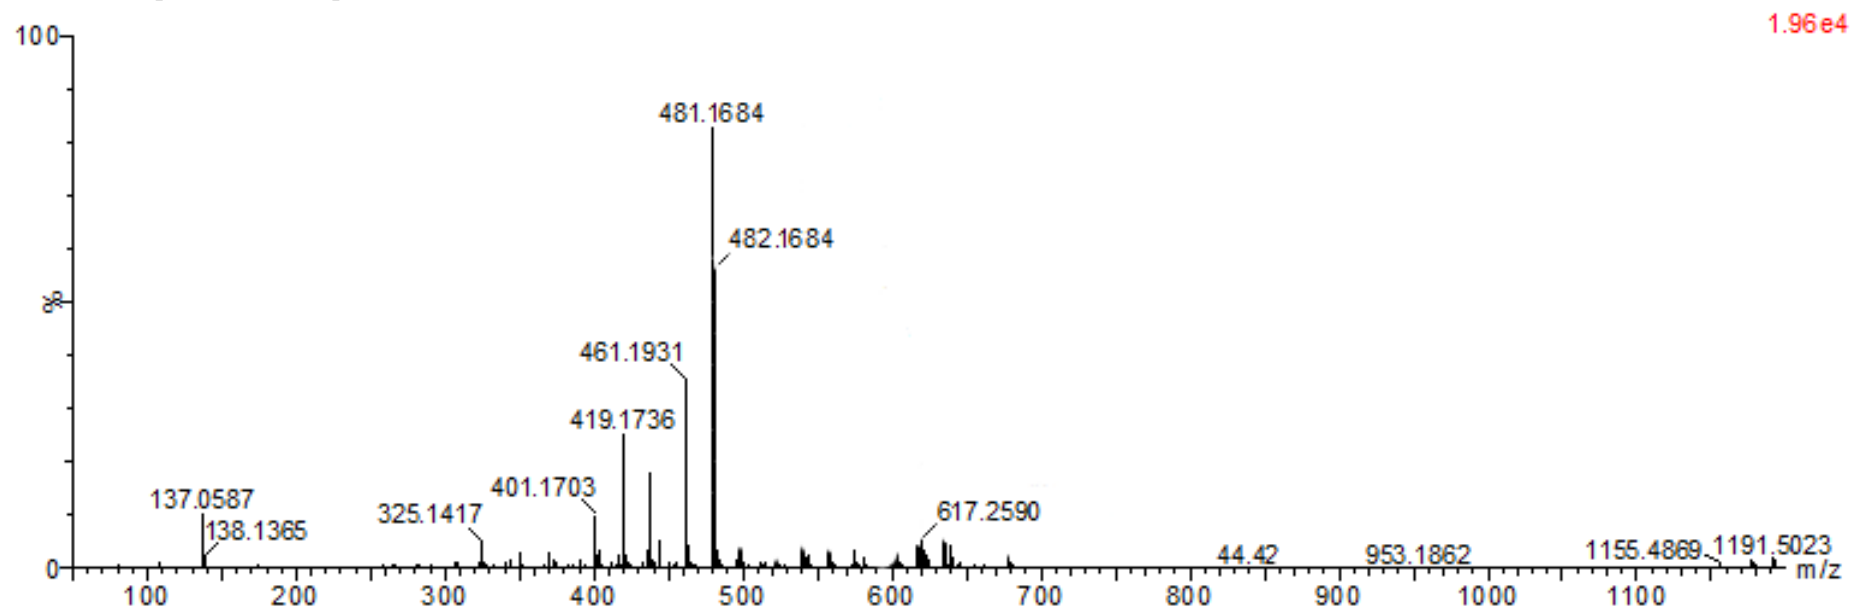

**Fig.S19.** MS Spectrum of compound **12**

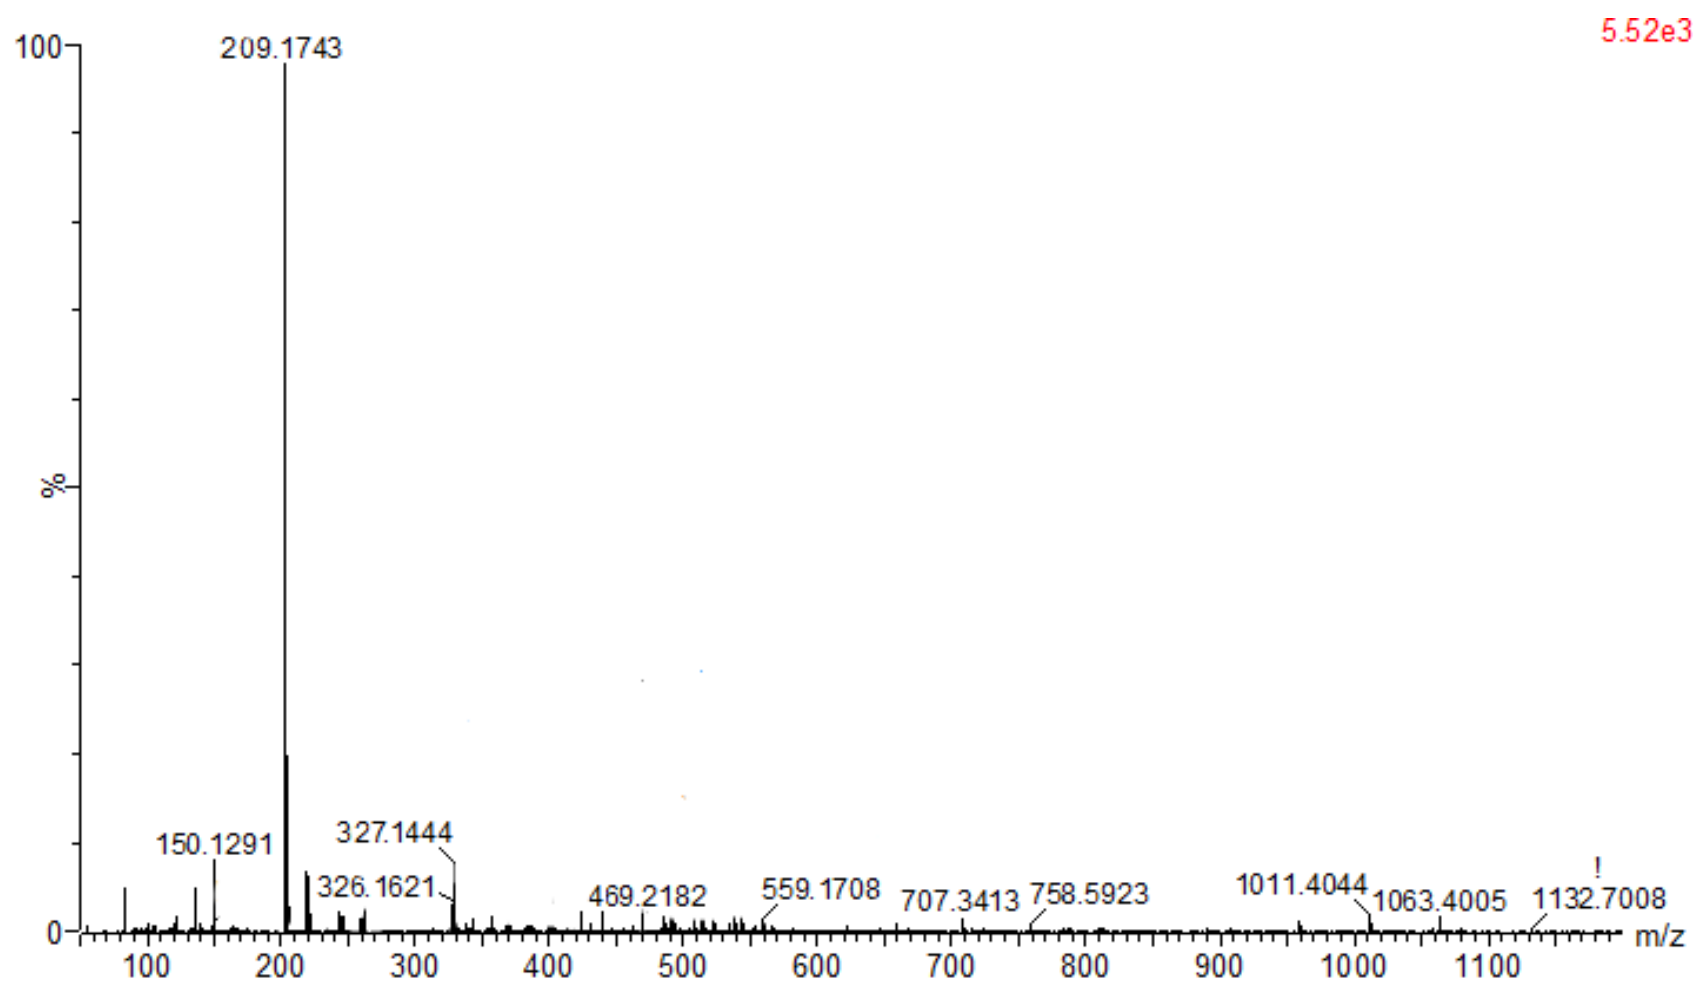

Fig.S20. MS Spectrum of compound 13

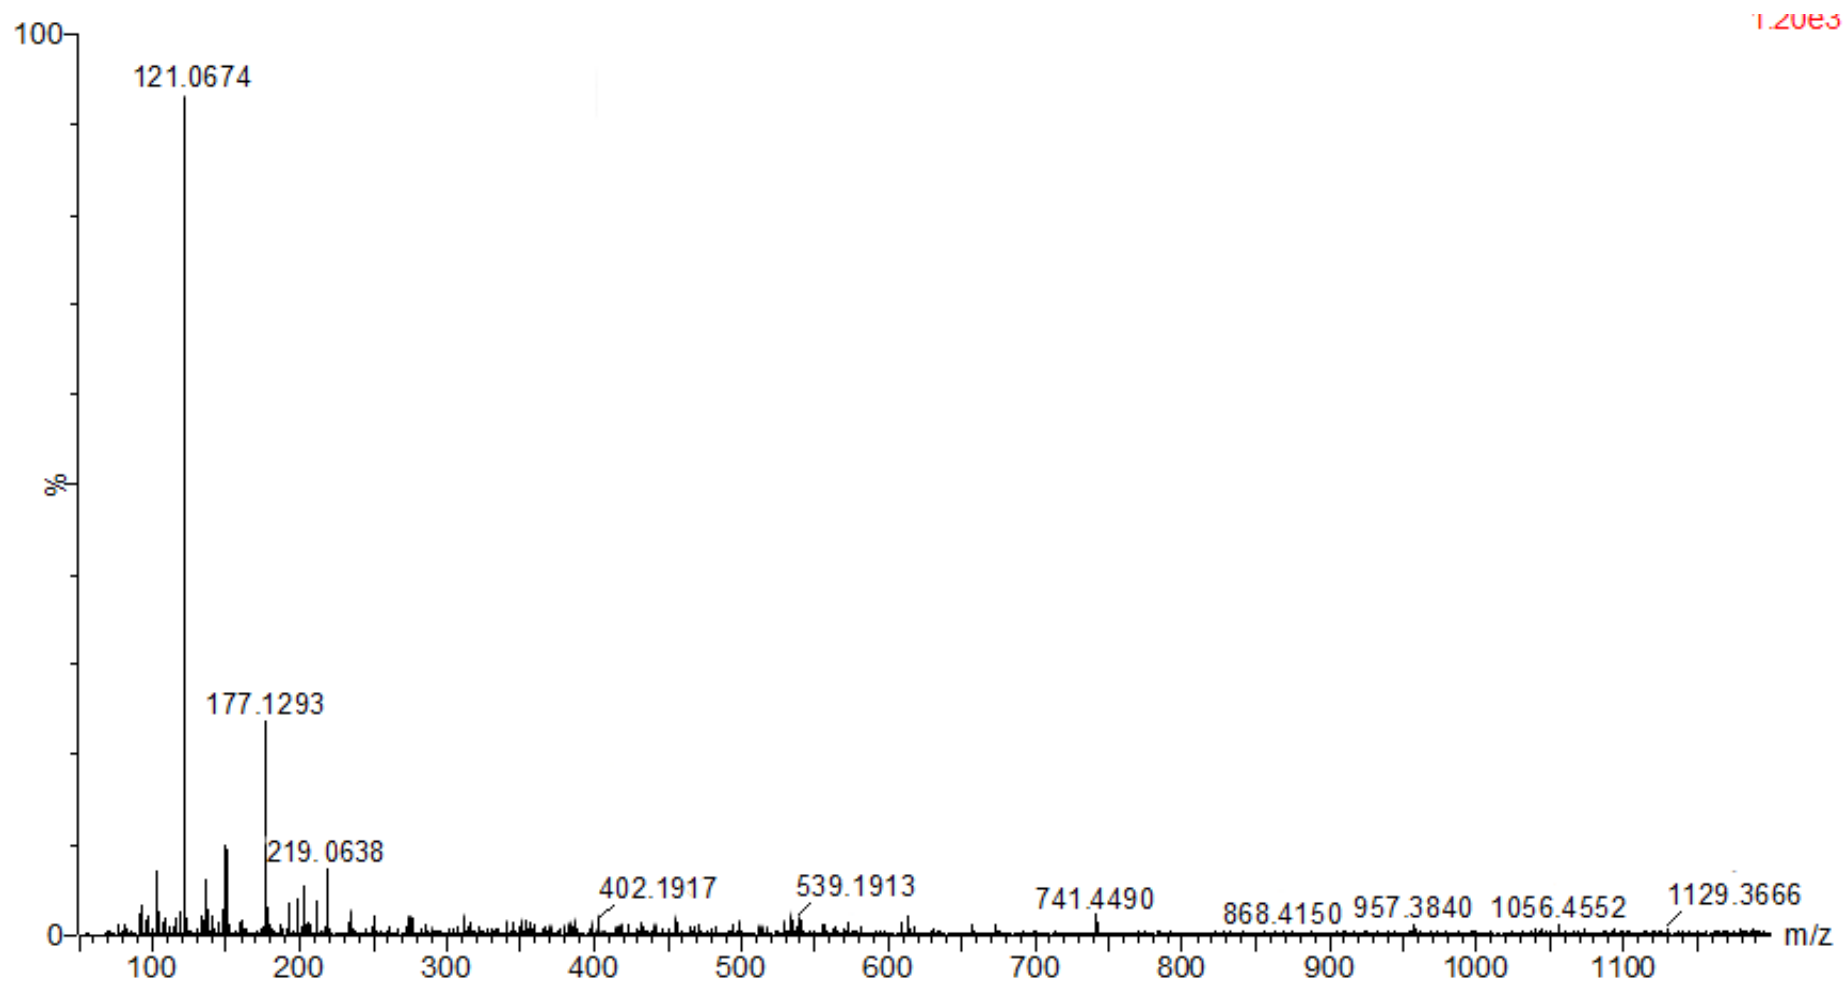

Supplement: Supplementary file 1 [file 10761154]
